# Supplementary material for: Metagenomic Sequencing to Analyze Composition and Function of Top-Gray Chalky Grain Microorganisms from Hybrid Rice Seeds
Source: MDPI journal article supplement (doi:10.3390/plants12122358), 2023-06-18
Supplement: s1 [file s1]

Table S2. Metagenome assembly

| Scaffolds (bp) |             | Scaffigs (bp) |             | Open reading frames (ORFs)    |         |
|----------------|-------------|---------------|-------------|-------------------------------|---------|
| Total          | 468,836,453 | Total         | 468,836,453 | Total                         | 570,029 |
| Average        | 1,485.82    | Average       | 1,486       | Gene catalogue                | 250,918 |
| N50            | 2,069.11    | N50           | 2,069       | Integrated gene catalog (IGC) | 149,383 |
| N90            | 634.33      | N90           | 634         | Integrated gene percent       | 59.53%  |
|                |             |               |             | GC percent                    | 46.97%  |
