# Supplementary material for: Metagenomic Sequencing to Analyze Composition and Function of Top-Gray Chalky Grain Microorganisms from Hybrid Rice Seeds
Source: MDPI journal article supplement (doi:10.3390/plants12122358), 2023-06-18
Supplement: s1 [file s1]

Table S1. Pre-processing results of sequencing data

| Raw data (Mbp) | Clean data (Mbp) | Non-host data (Mbp) | Effective rate (%) |
|----------------|------------------|---------------------|--------------------|
| 55,870.57      | 55,824.05        | 55,725.44           | 99.82              |
